# Supplementary material for: Evaluation of African Swine Fever Virus E111R Gene on Viral Replication and Porcine Virulence
Source: MDPI journal article supplement (doi:10.3390/v15040890), 2023-03-30
Supplement: s1 [file s1]

**Table S1.** Primers for (quantitative) PCR assay recommended by the National Standards of China

| Viruses | Primers               | Sequences (5'-3')                           | Product size(bp)                               | No. of reference standard |
|---------|-----------------------|---------------------------------------------|------------------------------------------------|---------------------------|
| CSFV    | CSFV-qF               | TACAGGACAGTCGTCAGTAGTTCGA-3'                | /a                                             | GB/T 27540-2011           |
|         | CSFV-qR               | CCGCTAGGGTTAAGGTGTGTCT                      |                                                |                           |
|         | CSFV-qP               | FAM-<br>CCCACCTCGAGATGCTATGTGGACGA-TAMRA    |                                                |                           |
| ASFV    | VP72-F1               | GCTTTCAGGATAGAGATACAGCTCT                   | /a                                             | GB/T 18648-2020           |
|         | VP72-R1               | CCGTAGTGGAAGGGTATGTAAGAG                    |                                                |                           |
|         | VP72-T1               | FAM-<br>CCGTAACTGCTCATGGTATCAATCTTATCG-BHQ1 |                                                |                           |
| PRRSV   | PRRSV-P <sub>1</sub>  | GGTTCGGAAGAACTGTCCG                         | HP <sup>b</sup> : 400<br>LP <sup>c</sup> : 264 | GB/T 27517-2011           |
|         | PRRSV-P <sub>2</sub>  | AGCAGGTGGAAGAAGCGAATC                       |                                                |                           |
|         | PRRSV-P <sub>3</sub>  | GAGCTGAGTATTTTGGGCGTG                       |                                                |                           |
| PPV     | PPV-F                 | TGGTCTCCTTCTGTGGTAGG                        | 445                                            | SN/T 1874-2007            |
|         | PPV-R                 | CAGAATCAGCAACCTCAC                          |                                                |                           |
| PRV     | PRV-gD-P <sub>1</sub> | CAGGAGGACGAGCTGGGGCT                        | 217                                            | GB/T 18641-2018           |
|         | PRV-gD-P <sub>2</sub> | GTCCACGCCCCGCTTGAAGCT                       |                                                |                           |
| PCV     | PCV-P <sub>1</sub>    | CCGCGGGCTGGCTGAACTT                         | PCV-1:<br>652<br>PCV-2:<br>1154                | GB/T 21674-2008           |
|         | PCV-P <sub>2</sub>    | CTCGGCTATGCGCTCCAAAATG                      |                                                |                           |
|         | PCV-P <sub>3</sub>    | ACCCCCGCCACCGCTACC                          |                                                |                           |

<sup>a</sup> /: real time quantitative PCR; <sup>b</sup> HP: high pathogenic; <sup>c</sup> LP: low pathogenic
